# Supplementary material
Source: publisher figshare collection journal article supplement (https://sage.figshare.com/ndownloader/files/24154469)
Supplement: Supplementary file 1 [file 24154469]

| <b>Explanatory variables</b>                                                            | <b>Coefficient</b> | <b>95% CI</b>    | <b>T-value</b> | <b>P-value</b> |
|-----------------------------------------------------------------------------------------|--------------------|------------------|----------------|----------------|
| <i>Model predicting occupational wellbeing</i> $R^2=59.2\%$ ( $R^2_{adj}: 54.9\%$ )     |                    |                  |                |                |
| MDS                                                                                     | -0.13              | (-0.19, -0.08)   | -4.87          | <0.001         |
| Gender (male vs female)                                                                 | 0.34               | (-0.06, 0.73)    | 1.70           | 0.097          |
| Employment (part time/casual vs full time)                                              | 0.23               | (-0.12, 0.57)    | 1.31           | 0.198          |
| Timing (run over-time vs run on-time)                                                   | -0.08              | (-0.42, 0.27)    | -0.44          | 0.664          |
| <i>Model predicting patient centred preference</i> $R^2=25.8\%$ ( $R^2_{adj}: 20.0\%$ ) |                    |                  |                |                |
| Peer support occupational well-being                                                    | 0.153              | (-0.033, 0.338)  | 1.66           | 0.105          |
| MDS                                                                                     | -0.008             | (-0.062, 0.047)  | -0.29          | 0.771          |
| Gender (male vs female)                                                                 | -0.485             | (-0.825, -0.144) | -2.88          | 0.006          |
| Peer support occupational well-being                                                    | 0.153              | (-0.033, 0.338)  | 1.66           | 0.105          |

#### **Appendix A: Linear regression model selected for the study analysis**
